# Supplementary material
Source: Elsevier journal article supplement (https://authors.library.caltech.edu/74413/5/mmc4.xlsx)
Supplement: mmc4 [file mmc4.xlsx]

## Sheet: Table S4
Table S4: Enriched GO Terms from List of Genes Upregulated in Adult intestine vs. HIOs
GO term	Description	P-value	FDR q-value	Enrichment (N, B, n, b)
GO:0044763	single-organism cellular process	7.35e-18	9.46e-14	1.15 (17946,8870,2820,1602)
GO:0044699	single-organism process	2.3e-17	1.48e-13	1.12 (17946,10681,2820,1878)
GO:0010033	response to organic substance	3e-11	1.29e-07	1.32 (17946,2182,2820,451)
GO:0042325	regulation of phosphorylation	3.7e-11	1.19e-07	1.45 (17946,1162,2820,265)
GO:0051234	establishment of localization	6.88e-11	1.77e-07	1.23 (17946,3429,2820,665)
GO:0051239	regulation of multicellular organismal process	8.1e-11	1.74e-07	1.31 (17946,2106,2820,435)
GO:0070887	cellular response to chemical stimulus	9.58e-11	1.76e-07	1.33 (17946,1895,2820,397)
GO:0006810	transport	2.54e-10	4.09e-07	1.23 (17946,3341,2820,646)
GO:0051179	localization	2.65e-10	3.79e-07	1.21 (17946,3737,2820,713)
GO:0019220	regulation of phosphate metabolic process	3.62e-10	4.67e-07	1.33 (17946,1796,2820,376)
GO:0051174	regulation of phosphorus metabolic process	4.13e-10	4.84e-07	1.33 (17946,1809,2820,378)
GO:0048518	positive regulation of biological process	2.08e-09	2.23e-06	1.18 (17946,4629,2820,855)
GO:0044765	single-organism transport	2.11e-09	2.09e-06	1.25 (17946,2667,2820,524)
GO:1902578	single-organism localization	2.81e-09	2.59e-06	1.24 (17946,2829,2820,551)
GO:0051241	negative regulation of multicellular organismal process	3.29e-09	2.82e-06	1.48 (17946,854,2820,198)
GO:0001932	regulation of protein phosphorylation	3.48e-09	2.8e-06	1.45 (17946,955,2820,217)
GO:0009719	response to endogenous stimulus	6.65e-09	5.04e-06	1.38 (17946,1232,2820,267)
GO:0044767	single-organism developmental process	7.03e-09	5.03e-06	1.19 (17946,3982,2820,743)
GO:0071310	cellular response to organic substance	7.86e-09	5.33e-06	1.33 (17946,1599,2820,333)
GO:0043549	regulation of kinase activity	1.93e-08	1.24e-05	1.49 (17946,725,2820,170)
GO:0050793	regulation of developmental process	2.49e-08	1.53e-05	1.30 (17946,1768,2820,360)
GO:0009725	response to hormone	2.77e-08	1.62e-05	1.47 (17946,760,2820,176)
GO:0045859	regulation of protein kinase activity	3.18e-08	1.78e-05	1.50 (17946,683,2820,161)
GO:0048522	positive regulation of cellular process	3.87e-08	2.08e-05	1.17 (17946,4176,2820,769)
GO:0022603	regulation of anatomical structure morphogenesis	5.12e-08	2.64e-05	1.48 (17946,719,2820,167)
GO:0051240	positive regulation of multicellular organismal process	5.33e-08	2.64e-05	1.37 (17946,1138,2820,245)
GO:0040012	regulation of locomotion	5.97e-08	2.85e-05	1.52 (17946,601,2820,144)
GO:0065009	regulation of molecular function	1e-07	4.62e-05	1.23 (17946,2441,2820,473)
GO:0005975	carbohydrate metabolic process	1.01e-07	4.48e-05	1.46 (17946,747,2820,171)
GO:0023051	regulation of signaling	1.17e-07	5.01e-05	1.23 (17946,2438,2820,472)
GO:0032502	developmental process	1.26e-07	5.22e-05	1.16 (17946,4379,2820,798)
GO:0071495	cellular response to endogenous stimulus	1.31e-07	5.27e-05	1.42 (17946,867,2820,193)
GO:0030334	regulation of cell migration	1.31e-07	5.12e-05	1.55 (17946,521,2820,127)
GO:0051270	regulation of cellular component movement	1.36e-07	5.15e-05	1.52 (17946,588,2820,140)
GO:0009966	regulation of signal transduction	1.44e-07	5.31e-05	1.25 (17946,2152,2820,422)
GO:2000145	regulation of cell motility	1.54e-07	5.52e-05	1.53 (17946,548,2820,132)
GO:0048583	regulation of response to stimulus	1.59e-07	5.53e-05	1.21 (17946,2860,2820,543)
GO:0051094	positive regulation of developmental process	1.86e-07	6.31e-05	1.40 (17946,898,2820,198)
GO:0010646	regulation of cell communication	2.93e-07	9.67e-05	1.22 (17946,2450,2820,471)
GO:2000026	regulation of multicellular organismal development	3.37e-07	0.000109	1.32 (17946,1335,2820,276)
GO:0032879	regulation of localization	3.41e-07	0.000107	1.26 (17946,1891,2820,374)
GO:0042326	negative regulation of phosphorylation	3.76e-07	0.000115	1.69 (17946,320,2820,85)
GO:0014706	striated muscle tissue development	6.5e-07	0.000195	2.53 (17946,73,2820,29)
GO:0007167	enzyme linked receptor protein signaling pathway	7.07e-07	0.000207	1.42 (17946,747,2820,167)
GO:0033993	response to lipid	7.11e-07	0.000204	1.45 (17946,662,2820,151)
GO:0060537	muscle tissue development	7.32e-07	0.000205	2.40 (17946,85,2820,32)
GO:0050896	response to stimulus	1.12e-06	0.000308	1.11 (17946,6610,2820,1151)
GO:0014070	response to organic cyclic compound	1.14e-06	0.000305	1.43 (17946,683,2820,154)
GO:0051338	regulation of transferase activity	1.16e-06	0.000305	1.39 (17946,839,2820,183)
GO:1901700	response to oxygen-containing compound	1.23e-06	0.000317	1.33 (17946,1142,2820,238)
GO:0051246	regulation of protein metabolic process	1.31e-06	0.000332	1.24 (17946,1979,2820,385)
GO:0045595	regulation of cell differentiation	1.47e-06	0.000364	1.30 (17946,1290,2820,264)
GO:0003012	muscle system process	1.66e-06	0.000404	1.77 (17946,234,2820,65)
GO:1902531	regulation of intracellular signal transduction	1.87e-06	0.000446	1.31 (17946,1232,2820,253)
GO:0045664	regulation of neuron differentiation	1.93e-06	0.000452	1.57 (17946,402,2820,99)
GO:0010562	positive regulation of phosphorus metabolic process	1.95e-06	0.00045	1.29 (17946,1317,2820,268)
GO:0045937	positive regulation of phosphate metabolic process	1.95e-06	0.000442	1.29 (17946,1317,2820,268)
GO:0042327	positive regulation of phosphorylation	1.98e-06	0.00044	1.39 (17946,786,2820,172)
GO:0050790	regulation of catalytic activity	2.05e-06	0.000448	1.23 (17946,2034,2820,393)
GO:0044711	single-organism biosynthetic process	2.34e-06	0.000502	1.33 (17946,1079,2820,225)
GO:0048856	anatomical structure development	2.34e-06	0.000494	1.20 (17946,2599,2820,489)
GO:0006936	muscle contraction	2.36e-06	0.000489	1.84 (17946,194,2820,56)
GO:0030154	cell differentiation	2.36e-06	0.000482	1.26 (17946,1627,2820,322)
GO:0048729	tissue morphogenesis	2.55e-06	0.000513	1.60 (17946,349,2820,88)
GO:0006171	cAMP biosynthetic process	2.86e-06	0.000567	4.38 (17946,16,2820,11)
GO:0044723	single-organism carbohydrate metabolic process	2.96e-06	0.000578	1.46 (17946,561,2820,129)
GO:0046058	cAMP metabolic process	3.26e-06	0.000627	3.18 (17946,34,2820,17)
GO:0032268	regulation of cellular protein metabolic process	3.5e-06	0.000662	1.24 (17946,1801,2820,351)
GO:0055085	transmembrane transport	4.07e-06	0.000761	1.32 (17946,1076,2820,223)
GO:0060284	regulation of cell development	4.2e-06	0.000772	1.42 (17946,655,2820,146)
GO:0051093	negative regulation of developmental process	5.25e-06	0.000952	1.39 (17946,733,2820,160)
GO:0045597	positive regulation of cell differentiation	5.68e-06	0.00102	1.40 (17946,680,2820,150)
GO:0051962	positive regulation of nervous system development	6.07e-06	0.00107	1.62 (17946,311,2820,79)
GO:0009987	cellular process	6.41e-06	0.00112	1.05 (17946,13170,2820,2163)
GO:0023057	negative regulation of signaling	6.63e-06	0.00114	1.33 (17946,983,2820,205)
GO:0007169	transmembrane receptor protein tyrosine kinase signaling pathway	6.82e-06	0.00116	1.45 (17946,554,2820,126)
GO:0009893	positive regulation of metabolic process	7.42e-06	0.00124	1.17 (17946,3012,2820,554)
GO:0006796	phosphate-containing compound metabolic process	8.67e-06	0.00143	1.20 (17946,2198,2820,416)
GO:0048869	cellular developmental process	8.7e-06	0.00142	1.20 (17946,2298,2820,433)
GO:0010648	negative regulation of cell communication	8.72e-06	0.0014	1.32 (17946,987,2820,205)
GO:0010563	negative regulation of phosphorus metabolic process	9.05e-06	0.00144	1.49 (17946,452,2820,106)
GO:0045936	negative regulation of phosphate metabolic process	9.05e-06	0.00142	1.49 (17946,452,2820,106)
GO:0008150	biological_process	9.29e-06	0.00144	1.03 (17946,15944,2820,2570)
GO:0050767	regulation of neurogenesis	9.72e-06	0.00149	1.46 (17946,505,2820,116)
GO:0009888	tissue development	1.01e-05	0.00154	1.41 (17946,617,2820,137)
GO:0043408	regulation of MAPK cascade	1.03e-05	0.00155	1.45 (17946,532,2820,121)
GO:0035556	intracellular signal transduction	1.07e-05	0.00159	1.26 (17946,1448,2820,286)
GO:0050769	positive regulation of neurogenesis	1.12e-05	0.00164	1.63 (17946,281,2820,72)
GO:0006793	phosphorus metabolic process	1.18e-05	0.0017	1.20 (17946,2240,2820,422)
GO:0040013	negative regulation of locomotion	1.24e-05	0.00177	1.75 (17946,204,2820,56)
GO:0044707	single-multicellular organism process	1.45e-05	0.00206	1.16 (17946,3011,2820,551)
GO:0001934	positive regulation of protein phosphorylation	1.66e-05	0.00232	1.39 (17946,666,2820,145)
GO:0042127	regulation of cell proliferation	1.75e-05	0.00243	1.26 (17946,1331,2820,264)
GO:0044093	positive regulation of molecular function	1.78e-05	0.00244	1.24 (17946,1555,2820,303)
GO:1901564	organonitrogen compound metabolic process	2.03e-05	0.00275	1.22 (17946,1737,2820,334)
GO:0005996	monosaccharide metabolic process	2.08e-05	0.00279	1.70 (17946,217,2820,58)
GO:0060193	positive regulation of lipase activity	2.1e-05	0.00279	2.15 (17946,89,2820,30)
GO:0007519	skeletal muscle tissue development	2.17e-05	0.00285	2.60 (17946,49,2820,20)
GO:0032870	cellular response to hormone stimulus	2.38e-05	0.00309	1.46 (17946,467,2820,107)
GO:0051960	regulation of nervous system development	2.46e-05	0.00317	1.41 (17946,563,2820,125)
GO:0048513	organ development	2.56e-05	0.00327	1.28 (17946,1116,2820,225)
GO:0051271	negative regulation of cellular component movement	2.62e-05	0.00331	1.75 (17946,185,2820,51)
GO:0010038	response to metal ion	2.67e-05	0.00334	1.63 (17946,253,2820,65)
GO:0070482	response to oxygen levels	2.69e-05	0.00333	1.63 (17946,258,2820,66)
GO:0009653	anatomical structure morphogenesis	2.75e-05	0.00337	1.27 (17946,1242,2820,247)
GO:0009967	positive regulation of signal transduction	2.89e-05	0.00351	1.28 (17946,1118,2820,225)
GO:0032501	multicellular organismal process	2.89e-05	0.00348	1.16 (17946,3071,2820,558)
GO:0048545	response to steroid hormone	3.41e-05	0.00407	1.52 (17946,356,2820,85)
GO:0001933	negative regulation of protein phosphorylation	3.47e-05	0.0041	1.62 (17946,255,2820,65)
GO:0045666	positive regulation of neuron differentiation	3.62e-05	0.00424	1.68 (17946,216,2820,57)
GO:0044281	small molecule metabolic process	3.74e-05	0.00434	1.17 (17946,2605,2820,479)
GO:0033673	negative regulation of kinase activity	3.81e-05	0.00438	1.71 (17946,197,2820,53)
GO:0048519	negative regulation of biological process	3.87e-05	0.00441	1.13 (17946,3920,2820,697)
GO:0051345	positive regulation of hydrolase activity	3.91e-05	0.00442	1.33 (17946,809,2820,169)
GO:0031399	regulation of protein modification process	4.03e-05	0.00452	1.26 (17946,1226,2820,243)
GO:0090183	regulation of kidney development	4.33e-05	0.00481	2.50 (17946,51,2820,20)
GO:0065008	regulation of biological quality	4.33e-05	0.00477	1.17 (17946,2567,2820,472)
GO:0006469	negative regulation of protein kinase activity	4.71e-05	0.00514	1.73 (17946,184,2820,50)
GO:0048523	negative regulation of cellular process	4.76e-05	0.00515	1.14 (17946,3592,2820,642)
GO:0071702	organic substance transport	4.85e-05	0.0052	1.21 (17946,1726,2820,329)
GO:0001666	response to hypoxia	5.01e-05	0.00534	1.63 (17946,238,2820,61)
GO:0010975	regulation of neuron projection development	5.06e-05	0.00535	1.58 (17946,278,2820,69)
GO:0023056	positive regulation of signaling	5.12e-05	0.00536	1.26 (17946,1236,2820,244)
GO:0009190	cyclic nucleotide biosynthetic process	5.18e-05	0.00538	2.89 (17946,33,2820,15)
GO:0010518	positive regulation of phospholipase activity	5.2e-05	0.00536	2.15 (17946,80,2820,27)
GO:0010720	positive regulation of cell development	5.31e-05	0.00543	1.51 (17946,355,2820,84)
GO:0070848	response to growth factor	5.5e-05	0.00558	1.39 (17946,578,2820,126)
GO:0048585	negative regulation of response to stimulus	5.53e-05	0.00556	1.27 (17946,1112,2820,222)
GO:0022604	regulation of cell morphogenesis	5.92e-05	0.00591	1.48 (17946,382,2820,89)
GO:1901566	organonitrogen compound biosynthetic process	5.97e-05	0.00592	1.39 (17946,552,2820,121)
GO:0009187	cyclic nucleotide metabolic process	6.13e-05	0.00603	2.39 (17946,56,2820,21)
GO:0060415	muscle tissue morphogenesis	6.13e-05	0.00598	2.39 (17946,56,2820,21)
GO:0048646	anatomical structure formation involved in morphogenesis	6.39e-05	0.00619	1.35 (17946,700,2820,148)
GO:0071900	regulation of protein serine/threonine kinase activity	6.42e-05	0.00617	1.46 (17946,409,2820,94)
GO:0006950	response to stress	6.43e-05	0.00614	1.16 (17946,2607,2820,477)
GO:0042692	muscle cell differentiation	6.49e-05	0.00614	1.92 (17946,116,2820,35)
GO:0009968	negative regulation of signal transduction	6.49e-05	0.00611	1.30 (17946,889,2820,182)
GO:2000146	negative regulation of cell motility	6.74e-05	0.00629	1.74 (17946,172,2820,47)
GO:0010517	regulation of phospholipase activity	7.3e-05	0.00677	2.05 (17946,90,2820,29)
GO:0030336	negative regulation of cell migration	7.6e-05	0.00699	1.74 (17946,168,2820,46)
GO:0048584	positive regulation of response to stimulus	7.6e-05	0.00695	1.22 (17946,1555,2820,298)
GO:0031344	regulation of cell projection organization	7.72e-05	0.007	1.48 (17946,369,2820,86)
GO:0071363	cellular response to growth factor stimulus	8e-05	0.00721	1.38 (17946,561,2820,122)
GO:1901698	response to nitrogen compound	8.16e-05	0.0073	1.33 (17946,731,2820,153)
GO:0051247	positive regulation of protein metabolic process	8.28e-05	0.00735	1.26 (17946,1159,2820,229)
GO:0001525	angiogenesis	8.39e-05	0.0074	1.61 (17946,237,2820,60)
GO:0036293	response to decreased oxygen levels	8.4e-05	0.00737	1.60 (17946,242,2820,61)
GO:0060191	regulation of lipase activity	8.58e-05	0.00747	1.88 (17946,122,2820,36)
GO:0051716	cellular response to stimulus	8.7e-05	0.00752	1.10 (17946,5347,2820,925)
GO:0030155	regulation of cell adhesion	8.86e-05	0.00761	1.51 (17946,334,2820,79)
GO:0045596	negative regulation of cell differentiation	8.87e-05	0.00757	1.37 (17946,584,2820,126)
GO:0002376	immune system process	9.11e-05	0.00772	1.21 (17946,1652,2820,314)
GO:0043409	negative regulation of MAPK cascade	9.26e-05	0.0078	1.85 (17946,127,2820,37)
GO:0045860	positive regulation of protein kinase activity	9.87e-05	0.00826	1.42 (17946,456,2820,102)
GO:0051049	regulation of transport	0.000107	0.00889	1.23 (17946,1417,2820,273)
GO:0071396	cellular response to lipid	0.000107	0.00885	1.52 (17946,310,2820,74)
GO:0040017	positive regulation of locomotion	0.000107	0.00879	1.52 (17946,310,2820,74)
GO:1901701	cellular response to oxygen-containing compound	0.000113	0.00921	1.33 (17946,708,2820,148)
GO:0010647	positive regulation of cell communication	0.000124	0.01	1.24 (17946,1241,2820,242)
GO:0052652	cyclic purine nucleotide metabolic process	0.000153	0.0123	2.78 (17946,32,2820,14)
GO:0043085	positive regulation of catalytic activity	0.000154	0.0123	1.23 (17946,1326,2820,256)
GO:0031325	positive regulation of cellular metabolic process	0.000156	0.0124	1.15 (17946,2799,2820,505)
GO:0015711	organic anion transport	0.000175	0.0138	1.49 (17946,325,2820,76)
GO:0042178	xenobiotic catabolic process	0.000181	0.0142	4.45 (17946,10,2820,7)
GO:0044710	single-organism metabolic process	0.000193	0.0151	1.11 (17946,4314,2820,753)
GO:0019318	hexose metabolic process	0.000193	0.015	1.66 (17946,184,2820,48)
GO:0060688	regulation of morphogenesis of a branching structure	0.000202	0.0156	2.33 (17946,52,2820,19)
GO:0044283	small molecule biosynthetic process	0.000229	0.0176	1.44 (17946,375,2820,85)
GO:0042221	response to chemical	0.000246	0.0187	1.13 (17946,3096,2820,552)
GO:0090184	positive regulation of kidney development	0.000251	0.019	2.58 (17946,37,2820,15)
GO:0032270	positive regulation of cellular protein metabolic process	0.000251	0.0189	1.25 (17946,1065,2820,209)
GO:0030335	positive regulation of cell migration	0.000251	0.0188	1.51 (17946,287,2820,68)
GO:1901135	carbohydrate derivative metabolic process	0.000271	0.0202	1.23 (17946,1216,2820,235)
GO:1902532	negative regulation of intracellular signal transduction	0.000281	0.0208	1.46 (17946,335,2820,77)
GO:0033674	positive regulation of kinase activity	0.0003	0.0221	1.38 (17946,480,2820,104)
GO:0010243	response to organonitrogen compound	0.000301	0.022	1.31 (17946,678,2820,140)
GO:2000147	positive regulation of cell motility	0.000304	0.0221	1.49 (17946,294,2820,69)
GO:0006629	lipid metabolic process	0.000318	0.023	1.25 (17946,1058,2820,207)
GO:0034976	response to endoplasmic reticulum stress	0.000328	0.0236	1.72 (17946,144,2820,39)
GO:0010942	positive regulation of cell death	0.000339	0.0242	1.35 (17946,558,2820,118)
GO:0055008	cardiac muscle tissue morphogenesis	0.000365	0.026	2.29 (17946,50,2820,18)
GO:0010863	positive regulation of phospholipase C activity	0.000387	0.0274	2.09 (17946,67,2820,22)
GO:0016477	cell migration	0.000388	0.0273	1.31 (17946,654,2820,135)
GO:0051336	regulation of hydrolase activity	0.000423	0.0296	1.23 (17946,1173,2820,226)
GO:0008284	positive regulation of cell proliferation	0.000437	0.0304	1.29 (17946,751,2820,152)
GO:0051272	positive regulation of cellular component movement	0.000446	0.0309	1.47 (17946,303,2820,70)
GO:0048514	blood vessel morphogenesis	0.000451	0.0311	2.03 (17946,72,2820,23)
GO:0042347	negative regulation of NF-kappaB import into nucleus	0.000452	0.031	3.64 (17946,14,2820,8)
GO:0071407	cellular response to organic cyclic compound	0.000456	0.0311	1.47 (17946,298,2820,69)
GO:1901699	cellular response to nitrogen compound	0.000461	0.0312	1.38 (17946,442,2820,96)
GO:0044255	cellular lipid metabolic process	0.000462	0.0311	1.27 (17946,814,2820,163)
GO:0043405	regulation of MAP kinase activity	0.000466	0.0313	1.50 (17946,267,2820,63)
GO:0043068	positive regulation of programmed cell death	0.000469	0.0313	1.34 (17946,535,2820,113)
GO:0010632	regulation of epithelial cell migration	0.000472	0.0314	1.74 (17946,132,2820,36)
GO:0006811	ion transport	0.000479	0.0317	1.22 (17946,1164,2820,224)
GO:0031324	negative regulation of cellular metabolic process	0.00048	0.0315	1.17 (17946,1927,2820,354)
GO:0030278	regulation of ossification	0.00048	0.0314	1.64 (17946,171,2820,44)
GO:0015807	L-amino acid transport	0.000495	0.0322	2.30 (17946,47,2820,17)
GO:0035962	response to interleukin-13	0.000498	0.0323	5.30 (17946,6,2820,5)
GO:0070201	regulation of establishment of protein localization	0.000499	0.0322	1.38 (17946,443,2820,96)
GO:0046903	secretion	0.000502	0.0322	1.35 (17946,503,2820,107)
GO:0010976	positive regulation of neuron projection development	0.000513	0.0327	1.69 (17946,147,2820,39)
GO:0008360	regulation of cell shape	0.000523	0.0332	1.81 (17946,109,2820,31)
GO:0043627	response to estrogen	0.000532	0.0336	1.66 (17946,157,2820,41)
GO:0003013	circulatory system process	0.000533	0.0335	1.74 (17946,128,2820,35)
GO:0009611	response to wounding	0.000539	0.0337	1.65 (17946,162,2820,42)
GO:0048878	chemical homeostasis	0.000558	0.0347	1.29 (17946,710,2820,144)
GO:0048754	branching morphogenesis of an epithelial tube	0.000567	0.0351	1.71 (17946,138,2820,37)
GO:0032321	positive regulation of Rho GTPase activity	0.000593	0.0365	1.68 (17946,148,2820,39)
GO:0010810	regulation of cell-substrate adhesion	0.000593	0.0364	1.68 (17946,148,2820,39)
GO:0009605	response to external stimulus	0.000595	0.0363	1.20 (17946,1343,2820,254)
GO:1901216	positive regulation of neuron death	0.000599	0.0364	2.16 (17946,56,2820,19)
GO:0036017	response to erythropoietin	0.000609	0.0368	6.36 (17946,4,2820,4)
GO:0036018	cellular response to erythropoietin	0.000609	0.0366	6.36 (17946,4,2820,4)
GO:1900274	regulation of phospholipase C activity	0.000612	0.0367	2.03 (17946,69,2820,22)
GO:1901137	carbohydrate derivative biosynthetic process	0.00063	0.0376	1.41 (17946,365,2820,81)
GO:0019637	organophosphate metabolic process	0.000633	0.0375	1.21 (17946,1222,2820,233)
GO:0001704	formation of primary germ layer	0.000671	0.0397	2.31 (17946,44,2820,16)
GO:0008610	lipid biosynthetic process	0.000693	0.0408	1.36 (17946,469,2820,100)
GO:0061138	morphogenesis of a branching epithelium	0.000701	0.041	1.64 (17946,159,2820,41)
GO:0019538	protein metabolic process	0.000711	0.0414	1.11 (17946,3520,2820,616)
GO:0007165	signal transduction	0.000712	0.0413	1.10 (17946,4361,2820,753)
GO:0030198	extracellular matrix organization	0.000731	0.0422	1.41 (17946,356,2820,79)
GO:0006820	anion transport	0.000733	0.0421	1.37 (17946,437,2820,94)
GO:0001775	cell activation	0.000734	0.042	1.32 (17946,569,2820,118)
GO:0019932	second-messenger-mediated signaling	0.000745	0.0425	1.70 (17946,135,2820,36)
GO:0016053	organic acid biosynthetic process	0.00075	0.0426	1.49 (17946,256,2820,60)
GO:0046394	carboxylic acid biosynthetic process	0.00075	0.0424	1.49 (17946,256,2820,60)
GO:0048870	cell motility	0.000757	0.0426	1.28 (17946,715,2820,144)
GO:0051130	positive regulation of cellular component organization	0.00079	0.0442	1.28 (17946,727,2820,146)
GO:0006897	endocytosis	0.000792	0.0442	1.44 (17946,309,2820,70)
GO:0043062	extracellular structure organization	0.000797	0.0442	1.41 (17946,357,2820,79)
GO:0032060	bleb assembly	0.000818	0.0452	4.24 (17946,9,2820,6)
GO:0010604	positive regulation of macromolecule metabolic process	0.000842	0.0464	1.15 (17946,2271,2820,409)
GO:0051248	negative regulation of protein metabolic process	0.000871	0.0477	1.26 (17946,791,2820,157)
GO:0071294	cellular response to zinc ion	0.000894	0.0488	3.71 (17946,12,2820,7)
GO:0001886	endothelial cell morphogenesis	0.000894	0.0486	3.71 (17946,12,2820,7)
GO:0048747	muscle fiber development	0.000913	0.0494	2.41 (17946,37,2820,14)
GO:1902533	positive regulation of intracellular signal transduction	0.000962	0.0518	1.27 (17946,736,2820,147)
GO:0010035	response to inorganic substance	0.000964	0.0517	1.39 (17946,370,2820,81)
